1 **Preprint: A robust peptidomics mass spectrometry platform for measuring oxytocin in**  
2 **plasma and serum**

3 Ole Kristian Brandtzaeg<sup>a</sup>, Elin Johnsen<sup>a</sup>, Hanne Roberg-Larsen<sup>a</sup>, Knut Fredrik Seip<sup>b</sup>, Siri Leknes<sup>c, d</sup>, Elsa  
4 Lundanes<sup>a</sup> and Steven Ray Wilson<sup>a\*</sup>

5

6 <sup>a</sup>Department of Chemistry, University of Oslo, Post Box 1033, Blindern, NO-0315 Oslo, Norway

7 <sup>b</sup>School of Pharmacy, University of Oslo, PO Box 1068, Blindern, NO-0316, Oslo, Norway

8 <sup>c</sup>Department of Psychology, University of Oslo, PO Box 1094, Blindern, NO-0317, Oslo Norway

9 <sup>d</sup>The Intervention Centre, Oslo University Hospital, PO Box 4950, Nydalen, NO-0424 Oslo, Norway

10

11 \*Corresponding author. Tel.: +47 970 10 953.

12 E-mail address: [stevenw@kjemi.uio.no](mailto:stevenw@kjemi.uio.no) (S.R. Wilson).

13

14

15

16

17

18

19

20

21

22

23

## 1 **Abstract**

2 Current approaches to measuring the cyclic peptide oxytocin in plasma/serum are associated with  
3 poor selectivity and/or inadequate sensitivity. We here describe a high performance nano liquid  
4 chromatography-mass spectrometry platform for measuring OT in human plasma/serum. The platform  
5 is extremely robust, allowing laborious sample clean-up steps to be omitted. OT binds strongly to  
6 plasma proteins, but a reduction/alkylation procedure breaks this bond, allowing ample detection of  
7 total OT. The method showed excellent quantitation properties, and was used to determine total OT  
8 levels to 0.5-1.2 ng/mL (evaluated with human plasma and cord serum). The method is compatible  
9 with accessible mass spectrometry instrumentation, finally allowing selective and easily comparable  
10 oxytocin measurements.

11

12

13

14

15

16

17

18

19

20

21

22

23 **Keywords:** oxytocin, peptidomics, neuropeptide, mass spectrometry, chromatography, human cord  
24 serum, pooled human plasma

## 1 Introduction

2 The neuropeptide oxytocin (OT) is a facilitator of childbirth and breastfeeding, and can activate  
3 maternal behavior <sup>1</sup> and partner preference <sup>2</sup> in animal models. In humans, OT levels have been  
4 related to e.g. autism <sup>3</sup>, and schizophrenia <sup>4</sup>. Several studies have reported a coordinated release of  
5 central and peripheral OT <sup>5,6</sup> and that peripheral levels can be a low-invasive indicator of central state  
6 <sup>7</sup>. However, the brain/blood OT relation is a disputed topic <sup>8</sup> casting doubt on the biomarker-ness of  
7 peripheral OT. A key source of skepticism is the absence of satisfactory analytical methodology of OT  
8 measurements <sup>9</sup>. Nearly without exception, enzyme-linked immunosorbent assays (ELISA) and  
9 radioimmunoassays (RIA) are used to monitor OT in blood and other biofluids. These methods have in  
10 recent years been severely criticized due to poor selectivity <sup>8,9</sup>. An alternative to ELISA/RIA is mass  
11 spectrometry (MS). The MS instrument allows unambiguous identification/quantification of e.g.  
12 peptides, by first recording the molecular mass of a compound (single MS), and then creating a  
13 molecular “fingerprint” by fragmenting the compound to smaller parts (MS/MS). Separating  
14 compounds in a mixture (e.g. plasma) prior to MS detection further strengthens identification and  
15 sensitivity. Peptides are typically separated using liquid chromatography (LC). LC-MS is an invaluable  
16 tool in virtually all areas of biomedical analysis. A notable exception is however OT measurement; the  
17 few published methods for LC-MS measurements of plasma OT <sup>10,11</sup> provide unsatisfactory sensitivity  
18 and varying results, and are therefore difficult to put to practical use. We here set out to develop a  
19 robust and sensitive method for quantification of OT in blood, as a remedy for the under-par LC-MS  
20 and ELISA/RIA performance regarding OT analysis. We here “borrow” tools from mass spectrometry  
21 based proteomics, namely i) nanoLC-MS (a particularly sensitive variant of LC-MS <sup>12</sup>) featuring on-line  
22 sample extraction <sup>13</sup>, and ii) a reduction/alkylation step <sup>14</sup>, allowing vastly increased OT extraction.

23

24

## 1 Results

### 2 Enabling nanoLC-MS for robust and simple plasma analysis

3 NanoLC-MS is exceptionally sensitive and selective instrumentation for identifying and measuring e.g.  
4 peptides<sup>12</sup>, and is commonplace in proteomics facilities. However, nanoLC-MS is rarely used for large-  
5 scale blood/serum/plasma sample analysis, in part due to its limited robustness (i.e. clogs easily if  
6 extensive sample preparation is not undertaken). This weakness was overcome by implementing an  
7 automated filtration/filter back-flush (AFFL) unit<sup>15</sup> to the nanoLC-MS system, allowing robust plasma  
8 analysis. Details are described below.

9 In preliminary experiments with a standard nanoLC-MS set-up (i.e. trap column for extraction +  
10 separation column), injecting protein precipitated pooled human plasma clogged the column(s) (see  
11 **Figure 1 A**). After just one plasma injection, it was not possible to reuse the columns, even after  
12 extensive washing attempts. Therefore, we incorporated an AFFL system upstream to the nanoLC-MS  
13 platform (see **Figure 1 B-C**). AFFL allows samples to pass through a stainless steel filter that captures  
14 particulate matter; this matter is flushed backwards off the filter after each injection, allowing filter  
15 intactness (and hence system robustness) for very large numbers of injections<sup>15</sup>. To illustrate, only a  
16 minimal increase in back pressure between the first to the hundredth plasma injection was observed  
17 (**Figure 1 A**). OT spiked to plasma could be chromatographed with excellent retention time  
18 repeatability (0.1 % RSD; see **Figure 1 D**). During this study, over 300 samples were injected without  
19 need for part/column replacement. Taken together, AFFL-SPE-nanoLC-MS is a highly suited platform  
20 for blood peptidomics, e.g. targeted determination of oxytocin.

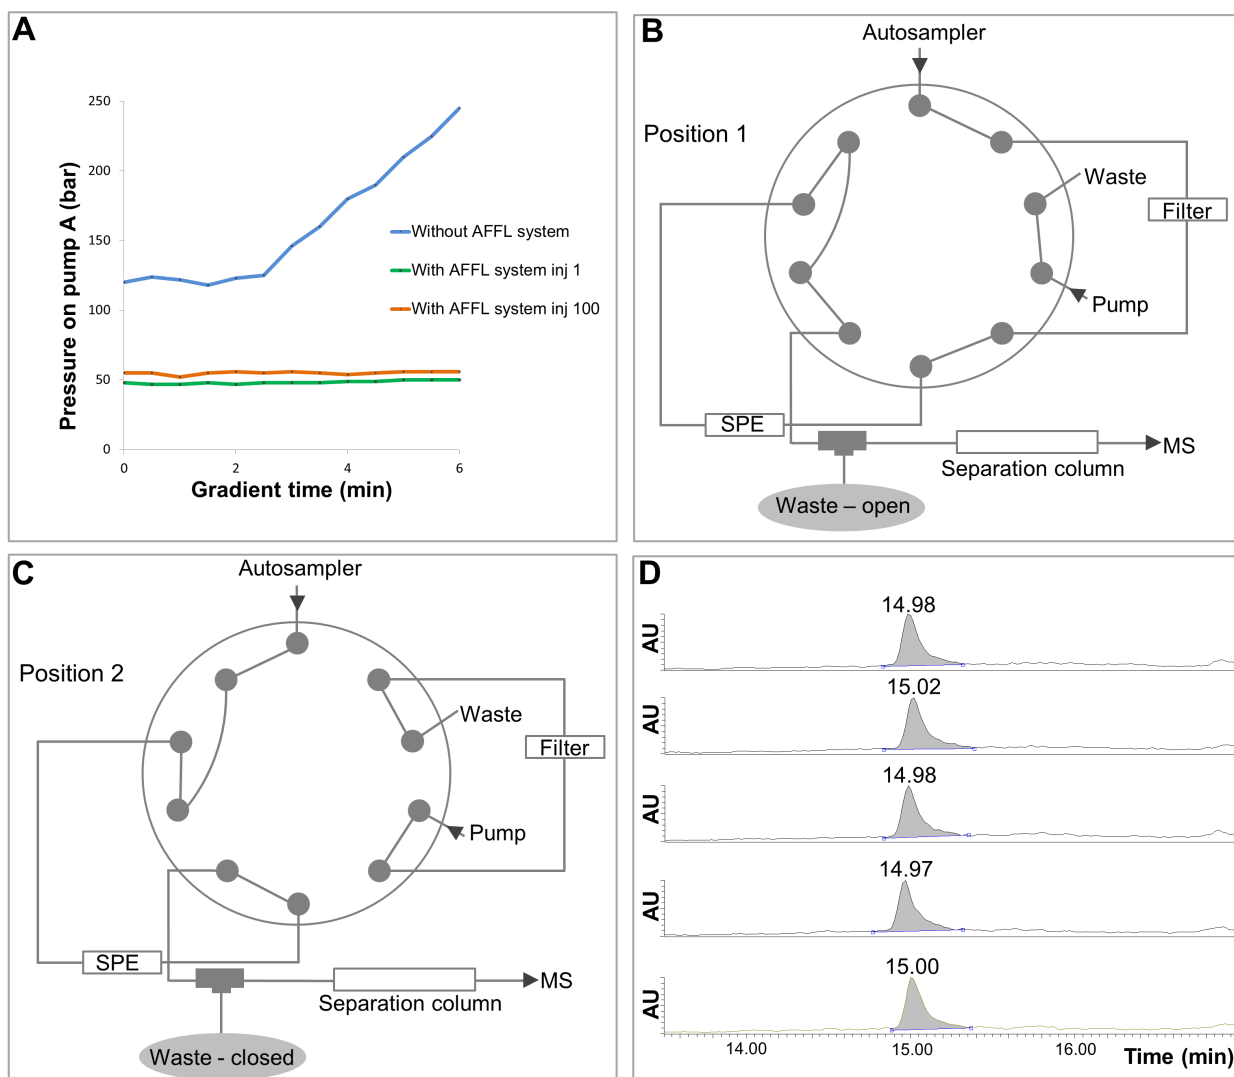

1

2 **Figure 1: AFFL-SPE-nanoLC-MS for plasma analysis.** **A.** Pressure profiles on pump A of the Easy nLC pump,  
3 during a 6 minutes gradient (0-90% B) at a flow rate 800 nL/min, when injecting a plasma sample without the  
4 AFFL system (blue line). The green line illustrates the pressure profile during the gradient for the first plasma  
5 sample injected when the AFFL system was incorporated, while the orange line illustrates the pressure profile  
6 during the gradient for the hundredth plasma injection onto the AFFL system. **B.** Position 1 of the external 10-  
7 port valve. In this position the particles are retained on the filter, while hydrophobic compounds (including OT)  
8 is retained on the SPE and salts and hydrophilic compounds are eluted to waste. **C.** Position 2 of the external 10-  
9 port valve. The filter is being back-flushed, and hydrophobic compounds are eluted off the SPE and separated  
10 on the separation column before detection by MS. **D.** Five injections of plasma sample spiked with OT to a final  
11 concentration of 500 pg/mL.

12

13

14

### **Sensitive and stable detection of plasma OT following a reduction/alkylation step**

15

We find that OT strongly binds to plasma proteins, which can seriously affect the sensitivity/measuring

16

accuracy in biomarker studies. However, performing a reduction and alkylation step liberates OT from

1 plasma proteins, allowing ample sensitivity and precise quantification of endogenous (total) OT. Details  
2 are described below.

3 Initially, samples contained 50 mM ZnCl<sub>2</sub> (10 mM aspartate buffer, pH 4.5) to stabilize OT via chelation  
4 <sup>16</sup> prior to subsequent sample preparation (e.g. removing proteins via protein precipitation (PPT)).

5 However, adding ZnCl<sub>2</sub> to plasma samples resulted in noisy signals and pressure build-up, likely due to  
6 on-column precipitation of salts and/or proteins. Acetonitrile based PPT (without the presence of  
7 chelating agents) was associated with an unassuring recovery profile (OT recovery dropped and leveled  
8 off after 40 minutes (**Figure SM 1**)). OT was stable in the solvents used during and after PPT (**Figure SM**  
9 **2**), and did not adsorb to tubes and vials. It was considered unlikely that the main metabolizing enzyme  
10 for OT in plasma, cystinyl aminopeptidase/oxytocinase <sup>17</sup> was degrading OT in these conditions, as this  
11 enzyme is rather large (subject to PPT), and blood from non-pregnant individuals was used. Therefore,  
12 we speculated that the recovery profile depicted a slow binding to protein remains. To further assess  
13 the issue of OT protein binding, pooled human plasma was spiked with oxytocin, and was stored on  
14 the laboratory bench up to 8 h before PPT; recovery of the spiked OT linearly deteriorated as function  
15 of time before the PPT step (**Figure SM 3**), once again suggesting a slow and strong protein binding  
16 after spiking. Furthermore, OT spiked to plasma had very poor filtrate recovery using size separation  
17 with centrifugal filters, again implying strong protein binding.

18 We hypothesized that strong protein binding was preventing detection of endogenous OT (<pg/mL  
19 levels, **Figure SM 4**) due to co-precipitation during PPT. The disulfide bridge (DSB) of OT (**Figure 2a**) can  
20 engage in complexes <sup>16</sup>, and likely with serum albumin (buminlbumi, which contains multiple DSBs. To  
21 obstruct plasma protein binding, a reduction/alkylation (R/A) <sup>14</sup> step was performed which irreversibly  
22 breaks DSBs (**Figure 2b**). When analyzing unspiked R/A treated plasma samples, endogenous OT was  
23 found to be present at strikingly high levels (see LC-MS chromatogram, **Figure 2b** and **Figure SM 5**).

24

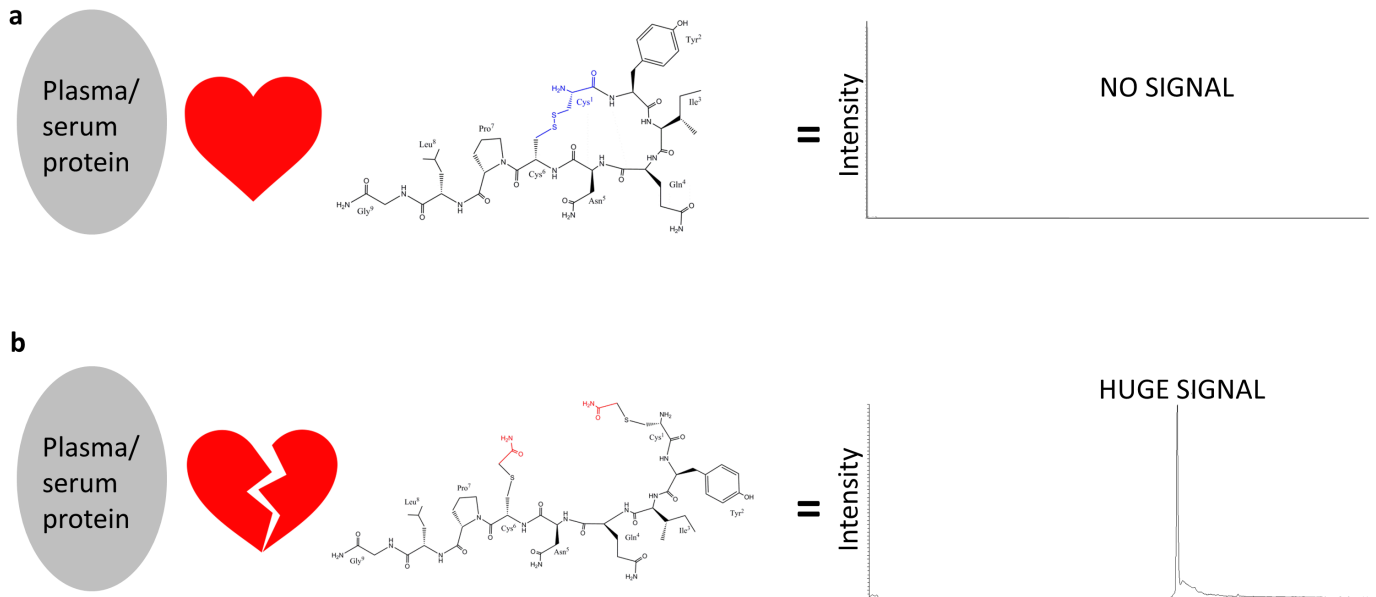

1

2 **Figure 2: Effect of reducing and alkylation on oxytocin measurement in plasma. A.** OT binds to plasma/serum  
3 proteins, and co-precipitate during sample preparation, resulting in poor detection. **B.** Reduction and alkylation  
4 breaks OT binding to plasma/serum proteins, preventing loss of oxytocin during sample preparation, resulting in  
5 ample detection.

6

7 OT was determined in pooled plasma and human cord serum, obtained from commercial sources: The

8 concentration of oxytocin in pooled human plasma from Sigma Aldrich and Innovative Research was

9 0.5 ng/mL and 0.7 ng/mL, respectively. For pooled human cord serum (Innovative Research) the OT

10 concentration was expectedly higher<sup>18</sup>, 1.2 ng/mL (**Figure 3a**). Oxytocin plasma levels were, as

11 expected, higher after nasal intake of OT (**Figure 3b**). However, the fold-change was very dependent

12 on the individual. For instance, person 2 (who described him/herself as highly anxious prior to sample

13 collection) had a markedly different OT plasma profile before/after intranasal administration. Our

14 results confirm the common assumption that OT levels can significantly vary between individuals<sup>19</sup>

15 (Identification/quantification of OT was based on using external standards, a deuterated internal

16 standard, and characteristic MS/MS transitions for quantification/qualification. The quantitative traits

17 of the assay included excellent linearity (5-2000 pg/mL,  $r^2 = 0.999$ ), high recovery (90 %) and good

18 precision/reliability (RSD: 0.4-4.3 %, depending on concentration); see **Figure SM 6**.

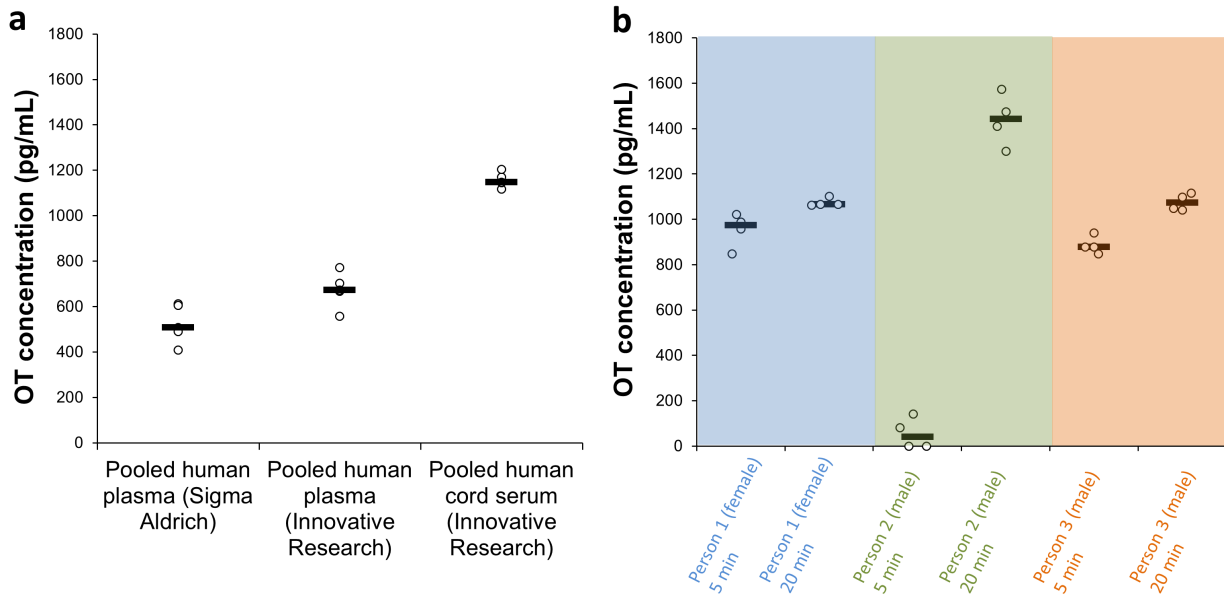

1

2 **Figure 3: Oxytocin levels in human plasma/serum. A.** OT basal levels in pooled human plasma from two  
3 vendors (Sigma Aldrich and Innovative Research), and OT basal levels in pooled human cord serum from  
4 Innovative Research. **B.** OT plasma concentration from three individuals sampled 5 and 20 minutes after  
5 applying two puffs of OT nasal spray in each nostril.

6

7

## 8 Discussion

9 A reduction and alkylation step was key in “liberating” oxytocin from plasma proteins, allowing ample  
10 detection of endogenous high pg-ng/mL amounts in human plasma. Tight plasma binding is not  
11 uncommon with biomarkers<sup>20</sup>. The OT levels observed in this study are remarkably higher compared  
12 to that obtained with an off-line extraction step (low pg/mL levels)<sup>21</sup>. With extraction, the vast  
13 majority of OT is discarded with plasma proteins, leaving only a minute free amount of OT left to be  
14 measured. Measuring only the free fraction, as currently recommended (ref leng, mccullogh) can be a  
15 confounding factor, since the free OT concentration can be drastically changed by factors such as age,  
16 morbidity, or by compounds that displace OT from proteins<sup>22</sup>. This is especially the case if the marker  
17 is heavily bound<sup>22</sup>, as we find with OT. Indeed, even using MS large variations are observed when  
18 measuring the free fraction of OT; a third of the human samples analyzed by Zhang et al did not  
19 contain detectable levels of OT<sup>10</sup>. We have also registered such inconsistencies with our own



1 “neurotransmitter-omics” MS platform <sup>11</sup>. In addition, free OT levels varied 6-fold within a  
2 homogenous group of rats <sup>10</sup>. As shown in Figure 3, when all circulating OT is measured using our  
3 method there differences between individuals are already pronounced individuals (but not unusually  
4 large compared to much of the metabolome). Such individual differences are thought to be highly  
5 informative <sup>19,23</sup>; additional confounding factors will undoubtedly make correlations less clear. Based  
6 on this reasoning, total OT is better suited as a biomarker than only the free fraction of OT.

7 Considering the growing concerns of antibody-based assays (both RIA and ELISA fall in to this category)  
8 regarding selectivity and antibody kit reproducibility <sup>24</sup>, LC-MS is a natural choice for OT measurements  
9 due to its excellent selectivity. The robust and highly automated AFFL-nanoLC-MS approach has  
10 attractive quantification traits, and can be simply implemented in e.g. proteomics facilities (common in  
11 e.g. many larger universities/hospitals). As the instrumentation is compatible with salty solutions,  
12 AFFL-nanoLC-MS can be used for urine and cerebral spinal fluid measurements as well (protein binding  
13 can also occur in these matrices). Other LC-MS systems can be employed, e.g. UPLC-MS systems used  
14 for drug measurements or metabolomics, but these may require off-line filtration/extraction steps.

15

## 16 **Methods**

### 17 **Chemicals and reagents**

18 Oxytocin (OT) acetate salt hydrate ( $\geq 97\%$ ), oxytocin-d<sub>5</sub> (98%, internal standard (IS)), dithiothreitol  
19 (DTT), iodoacetamide (IAM), acetonitrile (LC-MS grade), formic acid (FA, LC-MS grade) and pooled  
20 human plasma with 4% trisodium citrate as anticoagulant (P9523-5mL, lot#: SLBK0464V) were  
21 purchased from Sigma Aldrich (St. Louis, MO, USA). Pooled human plasma with EDTA as anticoagulant  
22 (lot#: 17964) and pooled human cord serum (lot#: 18241) were obtained from Innovated Research  
23 (Huntsville, AL, USA). 1 M Tris-HCl pH 8.0 was made by Oslo University Hospital (Oslo, Norway). LC-MS

1 grade water was bought from Fischer Scientific (Hampton, NH, USA), while type 1 water was acquired  
2 from a Milli-Q® Integral 5 water purification system (Merck Millipore, Billerica, MA, USA).

### 3 **Storage of stock solutions, plasma and serum**

4 Stock solutions of OT (5 µg/mL) and IS (10 µg/mL) dissolved in LC-MS grade water, pooled human  
5 plasma and pooled human cord serum were stored in freezer at -20° C.

### 7 **Preparation of calibration standards and samples**

8 For all standard solutions and plasma/serum samples, 10 µL of a 10 ng/mL working solution of IS were  
9 added so that the concentration in the final reconstitution volume (100 µL) was 1 ng/mL IS. All  
10 solutions were made in 1.5 mL Eppendorf LoBind tubes (Hamburg, Germany). Standard solutions used  
11 for establishing the calibration curve were made by appropriate diluting a working solution of 10  
12 ng/mL OT in 0.1 % FA with 0.1 % FA to a final concentration in the reconstituted solutions of 5, 500,  
13 1000 and 2000 pg/mL. Dilution of the plasma/serum samples and standard solutions was performed by  
14 pipetting (with newly calibrated pipettes) 100 µL of plasma/serum samples and standard solutions into  
15 200 µL 50 mM tris-HCl (pH 8.0). For reduction of disulfide bonds, 5 µL of 0.5 M DTT were added to all  
16 solutions followed by whirl mixing for 30 sec, incubation at 37° C for 45 min, and finally cooling to  
17 room temperature (22° C). Alkylation was done by adding 15 µL of 0.5 M IAM into each solution  
18 followed by whirl mixing for 30 sec before incubation at 22° C in the dark for 20 min. Protein  
19 precipitation was performed by adding ice-cold 80 % ACN in LC-MS grade water (v/v), and whirl mixing  
20 for 30 sec before centrifugation for 15 min at 14,000 relative centrifugal force (rcf) in an Eppendorf  
21 5415 R-model centrifuge (20° C) (Hamburg, Germany). The supernatant was pipetted into a new tube  
22 and evaporated to dryness in a Speed Vac® SC110-model from Savant, Thermo Fisher Scientific  
23 (Waltham, MA, USA), followed by reconstitution in 100 µL 0.1% FA in LC-MS grade water (v/v). Aliquots  
24 of 10 µL of this solution were analyzed by the nanoLC-MS/MS platform.

1 For investigating protein binding, OT was spiked into human plasma and 500  $\mu$ L was applied to 10K  
2 Amicon® ultra centrifugal filters from Merck Millipore (Billerica, MA, USA). An aliquot of 20  $\mu$ L of the  
3 filtrate was analyzed by the Bruker Easy nLC system (without AFFL) connected to a TSQ Quantiva™  
4 triple quadrupole mass spectrometer from Thermo Scientific.

5

## 6 **Nasal spray experiment**

7 Three healthy volunteers, one female and two males were asked to apply two puffs of OT nasal spray  
8 (6.7  $\mu$ g OT/puff, Syntocinon® from Sigma-Tau Pharmaceuticals, inc., Gaithersburg, MD, USA) in each  
9 nostril. The subjects were asked to spray close to the respiratory region, where there has previously  
10 been shown best absorption<sup>25</sup>. Two blood samples were drawn from each participant; one 5 min and  
11 another 20 min after the puffs of OT nasal spray were applied. Plasma was made and the samples were  
12 analyzed the same day (n=4).

13

## 14 **Automatic filtration and filter back-flush (AFFL) solid phase extraction nanoLC tandem MS** 15 **peptidomics platform**

16 An EASY-nLC liquid chromatograph with an integrated 6x4 autosampler from Bruker (Billerica, MA,  
17 USA) was used as pump. Mobile phase A was 0.1% FA in LC-MS grade water (v/v), while Mobile phase  
18 B was 0.1% FA in LC-MS grade acetonitrile (ACN). The loading mobile phase composition was 0.1% FA  
19 in LC-MS grade water. The external 10-port valve from VICI (Schenkon, Switzerland) controlled by the  
20 MS-software was used in the AFFL system. See Figure 1 for plumbing of the AFFL system. A Hitachi L-  
21 7100 HPLC pump (Chiyoda, Tokyo, Japan) in isocratic mode was used to back-flush the filter in the AFFL  
22 system with type 1 water. In position 1 (Figure 1 A), the sample passed through a stainless steel filter  
23 (1  $\mu$ m porosity, 1/16" screen, VICI) onto a 100  $\mu$ m ID x 50 mm silica monolithic C18 SPE manufactured

1 as described in <sup>26</sup> (similar to Chromolith® CapRod C18 capillary columns from Merck Millipore). In  
2 position 2 (Figure 1 B), two processes happened simultaneously; the filter is back-flushed, while  
3 oxytocin is back-flushed from the SPE column onto a 100 µm ID x 150 mm silica monolithic C18  
4 separation column manufactured as described in <sup>26</sup> (similar to Chromolith® CapRod C18 capillary  
5 columns from Merck Millipore). A steel emitter, 30 µm ID x 40 mm, from Thermo Scientific, was  
6 connected to the end of the separation column by a 1/16" standard steel internal union from VICI. A  
7 nanospray Flex™ ion source (nanoESI) coupled to a Quantiva™ triple quadrupole mass spectrometer  
8 from Thermo Scientific was used for detection of oxytocin in full MS- and tandem MS-mode (MS/MS).

9

#### 10 **Liquid chromatography and mass spectrometry parameters**

11 The 20 min gradient program was composed as follows: 20 %B isocratic elution for 14 min, followed by  
12 an increase from 20 to 90 % B in 2 min before isocratic elution at 90 % B for 4 min. The injection  
13 volume was 10 µL. The SPE was equilibrated with 4 µL 0.1 % FA in LC-MS grade water at a constant  
14 flow rate of 3 µL/min, while the separation column was equilibrated with 5 µL 0.1 % FA in LC-MS grade  
15 water at a flow rate of 3 µL/min before each injection. The MS was operated in positive MS-mode and  
16 selected reaction monitoring (SRM) mode was used. The spray voltage was set to 1.6 kV. The precursor  
17 ions for native oxytocin and IS were  $m/z$  1007.475 and  $m/z$  1012.475, respectively. For oxytocin the  
18 product ions were  $m/z$  285.125 with 38 V collision energy (CE), and  $m/z$  723.225 with 30 V CE. For IS  
19 the product ions were  $m/z$  290.125 with 38 V CE, and  $m/z$  723.225 with 30 V CE. The precursor ions for  
20 reduced and alkylated (R/A) oxytocin and IS were  $m/z$  1123.547 and  $m/z$  1128.547, respectively. For  
21 R/A oxytocin the product ions were  $m/z$  285.125 with 38 V CE, and  $m/z$  839.302 with 30 V CE. For R/A  
22 IS the product ions were  $m/z$  290.125 with 38 V CE and  $m/z$  839.302 with 30 V CE. The Q1 and Q3  
23 resolutions were both set to 1.2 FWHM, and the RF lens had a voltage of 185. A cycle time of 1 sec was

1 used with 3 mTorr collision-induced dissociation (CID) gas. Argon was used as collision gas. In addition,  
2 25 V source fragmentation energy was used together with 3 secs chrom filter.

3

#### 4 **Data analysis and interpretation**

5 Data analysis and interpretation were done using Xcalibur™ software version 3.0 from Thermo  
6 Scientific.

7

#### 8 **Ethical statement**

9 All subjects gave written informed consent, and the blood collection was approved by the Regional  
10 Ethics Committee (2011/1337/REK S-OE D). All methods were carried out in accordance with the  
11 approved guidelines and regulations.

12

13

#### 14 **References**

- 15 1 Kendrick, K., Keverne, E. & Baldwin, B. Intracerebroventricular oxytocin stimulates  
16 maternal behaviour in the sheep. *Neuroendocrinology* **46**, 56-61 (1987).
- 17 2 Williams, J. R., Insel, T. R., Harbaugh, C. R. & Carter, C. S. Oxytocin administered  
18 centrally facilitates formation of a partner preference in female prairie voles  
19 (*Microtus ochrogaster*). *Journal of neuroendocrinology* **6**, 247-250 (1994).
- 20 3 Modahl, C. *et al.* Plasma oxytocin levels in autistic children. *Biological psychiatry* **43**,  
21 270-277 (1998).
- 22 4 Feifel, D. *et al.* Adjunctive intranasal oxytocin reduces symptoms in schizophrenia  
23 patients. *Biological psychiatry* **68**, 678-680 (2010).
- 24 5 Wotjak, C. *et al.* Dissociated central and peripheral release of vasopressin, but not  
25 oxytocin, in response to repeated swim stress: new insights into the secretory  
26 capacities of peptidergic neurons. *Neuroscience* **85**, 1209-1222 (1998).
- 27 6 Ross, H. E. & Young, L. J. Oxytocin and the neural mechanisms regulating social  
28 cognition and affiliative behavior. *Frontiers in neuroendocrinology* **30**, 534-547  
29 (2009).
- 30 7 Carson, D. *et al.* Cerebrospinal fluid and plasma oxytocin concentrations are  
31 positively correlated and negatively predict anxiety in children. *Molecular*  
32 *psychiatry* **20**, 1085-1090 (2015).
- 33 8 Leng, G. & Ludwig, M. Intranasal oxytocin: myths and delusions. *Biological*  
34 *psychiatry* **79**, 243-250 (2016).

- 1 9 McCullough, M. E., Churchland, P. S. & Mendez, A. J. Problems with measuring  
2 peripheral oxytocin: Can the data on oxytocin and human behavior be trusted?  
3 *Neuroscience & Biobehavioral Reviews* **37**, 1485-1492 (2013).
- 4 10 Zhang, G., Zhang, Y., Fast, D. M., Lin, Z. & Steenwyk, R. Ultra sensitive quantitation of  
5 endogenous oxytocin in rat and human plasma using a two-dimensional liquid  
6 chromatography–tandem mass spectrometry assay. *Analytical biochemistry* **416**,  
7 45-52 (2011).
- 8 11 Johnsen, E., Leknes, S., Wilson, S. R. & Lundanes, E. Liquid chromatography-mass  
9 spectrometry platform for both small neurotransmitters and neuropeptides in  
10 blood, with automatic and robust solid phase extraction. *Scientific reports* **5** (2015).
- 11 12 Wilson, S. R., Vehus, T., Berg, H. S. & Lundanes, E. Nano-LC in proteomics: recent  
12 advances and approaches. *Bioanalysis* **7**, 1799-1815 (2015).
- 13 13 Rogeberg, M., Malerod, H., Roberg-Larsen, H., Aass, C. & Wilson, S. R. On-line solid  
14 phase extraction–liquid chromatography, with emphasis on modern bioanalysis  
15 and miniaturized systems. *Journal of pharmaceutical and biomedical analysis* **87**,  
16 120-129 (2014).
- 17 14 Fraenkel-Conrat, H., Mohammad, A., Ducay, E. & Mecham, D. The molecular weight  
18 of lysozyme after reduction and alkylation of the disulfide bonds. *Journal of the  
19 American Chemical Society* **73**, 625-627 (1951).
- 20 15 Roberg-Larsen, H. *et al.* High sensitivity measurements of active oxysterols with  
21 automated filtration/filter backflush-solid phase extraction-liquid  
22 chromatography–mass spectrometry. *Journal of chromatography A* **1255**, 291-297  
23 (2012).
- 24 16 Avanti, C. *et al.* The formation of oxytocin dimers is suppressed by the zinc–  
25 aspartate–oxytocin complex. *Journal of pharmaceutical sciences* **102**, 1734-1741  
26 (2013).
- 27 17 Barrett, A. J., Woessner, J. F. & Rawlings, N. D. *Handbook of proteolytic enzymes*. Vol.  
28 1 (Elsevier, 2012).
- 29 18 Brunton, P. J. & Russell, J. A. The expectant brain: adapting for motherhood. *Nature  
30 Reviews Neuroscience* **9**, 11-25 (2008).
- 31 19 Bartz, J. A., Zaki, J., Bolger, N. & Ochsner, K. N. Social effects of oxytocin in humans:  
32 context and person matter. *Trends in cognitive sciences* **15**, 301-309 (2011).
- 33 20 Mehta, A. I. *et al.* Biomarker amplification by serum carrier protein binding. *Disease  
34 Markers* **19**, 1-10 (2003).
- 35 21 Christensen, J. C., Shiyanov, P. A., Estep, J. R. & Schlager, J. J. Lack of association  
36 between human plasma oxytocin and interpersonal trust in a prisoner’s dilemma  
37 paradigm. *PLoS one* **9**, e116172 (2014).
- 38 22 Bryson, S. M. Clinical Pharmacokinetics: Concepts and applications. *Journal of  
39 Clinical Pharmacy and Therapeutics* **8**, 87-88 (1983).
- 40 23 Feldman, R. Oxytocin and social affiliation in humans. *Hormones and behavior* **61**,  
41 380-391 (2012).
- 42 24 Baker, M. Blame it on the antibodies. *Nature* **521**, 274-276 (2015).
- 43 25 Arora, P., Sharma, S. & Garg, S. Permeability issues in nasal drug delivery. *Drug  
44 discovery today* **7**, 967-975 (2002).
- 45 26 Miyamoto, K. *et al.* High-efficiency liquid chromatographic separation utilizing long  
46 monolithic silica capillary columns. *Analytical chemistry* **80**, 8741-8750 (2008).
- 47 1 Kendrick, K., Keverne, E. & Baldwin, B. Intracerebroventricular oxytocin stimulates  
48 maternal behaviour in the sheep. *Neuroendocrinology* **46**, 56-61 (1987).

- 1 2 Williams, J. R., Insel, T. R., Harbaugh, C. R. & Carter, C. S. Oxytocin administered  
2 centrally facilitates formation of a partner preference in female prairie voles  
3 (*Microtus ochrogaster*). *Journal of neuroendocrinology* **6**, 247-250 (1994).
- 4 3 Modahl, C. *et al.* Plasma oxytocin levels in autistic children. *Biological psychiatry* **43**,  
5 270-277 (1998).
- 6 4 Feifel, D. *et al.* Adjunctive intranasal oxytocin reduces symptoms in schizophrenia  
7 patients. *Biological psychiatry* **68**, 678-680 (2010).
- 8 5 Wotjak, C. *et al.* Dissociated central and peripheral release of vasopressin, but not  
9 oxytocin, in response to repeated swim stress: new insights into the secretory  
10 capacities of peptidergic neurons. *Neuroscience* **85**, 1209-1222 (1998).
- 11 6 Ross, H. E. & Young, L. J. Oxytocin and the neural mechanisms regulating social  
12 cognition and affiliative behavior. *Frontiers in neuroendocrinology* **30**, 534-547  
13 (2009).
- 14 7 Carson, D. *et al.* Cerebrospinal fluid and plasma oxytocin concentrations are  
15 positively correlated and negatively predict anxiety in children. *Molecular*  
16 *psychiatry* **20**, 1085-1090 (2015).
- 17 8 Leng, G. & Ludwig, M. Intranasal oxytocin: myths and delusions. *Biological*  
18 *psychiatry* **79**, 243-250 (2016).
- 19 9 McCullough, M. E., Churchland, P. S. & Mendez, A. J. Problems with measuring  
20 peripheral oxytocin: Can the data on oxytocin and human behavior be trusted?  
21 *Neuroscience & Biobehavioral Reviews* **37**, 1485-1492 (2013).
- 22 10 Zhang, G., Zhang, Y., Fast, D. M., Lin, Z. & Steenwyk, R. Ultra sensitive quantitation of  
23 endogenous oxytocin in rat and human plasma using a two-dimensional liquid  
24 chromatography–tandem mass spectrometry assay. *Analytical biochemistry* **416**,  
25 45-52 (2011).
- 26 11 Johnsen, E., Leknes, S., Wilson, S. R. & Lundanes, E. Liquid chromatography-mass  
27 spectrometry platform for both small neurotransmitters and neuropeptides in  
28 blood, with automatic and robust solid phase extraction. *Scientific reports* **5** (2015).
- 29 12 Wilson, S. R., Vehus, T., Berg, H. S. & Lundanes, E. Nano-LC in proteomics: recent  
30 advances and approaches. *Bioanalysis* **7**, 1799-1815 (2015).
- 31 13 Rogeberg, M., Malerod, H., Roberg-Larsen, H., Aass, C. & Wilson, S. R. On-line solid  
32 phase extraction–liquid chromatography, with emphasis on modern bioanalysis  
33 and miniaturized systems. *Journal of pharmaceutical and biomedical analysis* **87**,  
34 120-129 (2014).
- 35 14 Fraenkel-Conrat, H., Mohammad, A., Ducay, E. & Mecham, D. The molecular weight  
36 of lysozyme after reduction and alkylation of the disulfide bonds. *Journal of the*  
37 *American Chemical Society* **73**, 625-627 (1951).
- 38 15 Roberg-Larsen, H. *et al.* High sensitivity measurements of active oxysterols with  
39 automated filtration/filter backflush-solid phase extraction-liquid  
40 chromatography–mass spectrometry. *Journal of chromatography A* **1255**, 291-297  
41 (2012).
- 42 16 Avanti, C. *et al.* The formation of oxytocin dimers is suppressed by the zinc–  
43 aspartate–oxytocin complex. *Journal of pharmaceutical sciences* **102**, 1734-1741  
44 (2013).
- 45 17 Barrett, A. J., Woessner, J. F. & Rawlings, N. D. *Handbook of proteolytic enzymes*. Vol.  
46 1 (Elsevier, 2012).
- 47 18 Brunton, P. J. & Russell, J. A. The expectant brain: adapting for motherhood. *Nature*  
48 *Reviews Neuroscience* **9**, 11-25 (2008).

- 1 19 Bartz, J. A., Zaki, J., Bolger, N. & Ochsner, K. N. Social effects of oxytocin in humans:  
2 context and person matter. *Trends in cognitive sciences* **15**, 301-309 (2011).
- 3 20 Mehta, A. I. *et al.* Biomarker amplification by serum carrier protein binding. *Disease*  
4 *Markers* **19**, 1-10 (2003).
- 5 21 Christensen, J. C., Shiyanov, P. A., Estep, J. R. & Schlager, J. J. Lack of association  
6 between human plasma oxytocin and interpersonal trust in a prisoner's dilemma  
7 paradigm. *PLoS one* **9**, e116172 (2014).
- 8 22 Bryson, S. M. Clinical Pharmacokinetics: Concepts and applications. *Journal of*  
9 *Clinical Pharmacy and Therapeutics* **8**, 87-88 (1983).
- 10 23 Feldman, R. Oxytocin and social affiliation in humans. *Hormones and behavior* **61**,  
11 380-391 (2012).
- 12 24 Arora, P., Sharma, S. & Garg, S. Permeability issues in nasal drug delivery. *Drug*  
13 *discovery today* **7**, 967-975 (2002).
- 14 25 Miyamoto, K. *et al.* High-efficiency liquid chromatographic separation utilizing long  
15 monolithic silica capillary columns. *Analytical chemistry* **80**, 8741-8750 (2008).
